# Supplementary material
Source: HighWire-hosted journal article supplement (https://bmjopen.bmj.com/content/11/7/e044806)
Supplement: inline-supplementary-material-1 [file inline-supplementary-material-1.pdf]

## SUPPLEMENTARY MATERIAL

## RECRUITMENT POSTER

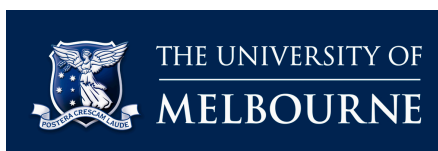

We are interested in how people feel about how their general practitioner (GP) chooses their blood pressure medication

We are seeking **people who are taking an ACE inhibitor for their blood pressure** (medications ending in -pril or brand names such as Renitec, Tritace, etc), to participate in an approximately 30-minute phone or face to face interview to discuss these with you.

This research is authorised by the University of Melbourne (ethics ID1955072).

Please email your contact details to 4th-year medical student Ms Tessa Marshall [tmarshall@student.unimelb.edu.au](mailto:tmarshall@student.unimelb.edu.au) or call +61 3 8344 9042 if you are interested.

Your contact details will not be used for any other purpose.

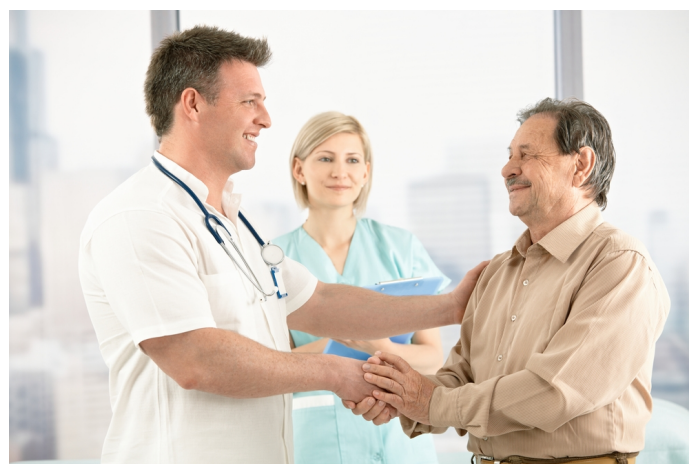

## SOCIAL MEDIA IMAGE AND BLURB



We are interested in how people feel about how their general practitioner (GP) chooses their blood pressure medication.

**Contact us now to participate!**

  
THE UNIVERSITY OF  
MELBOURNE

*Accompanying text:*

We are seeking people on an ACE inhibitor (meds ending in -pril or brand names such as Renitec, Tritace) to participate in a ~30-min phone or face to face interview to discuss these with you. If interested, email [tmarshall@student.unimelb.edu.au](mailto:tmarshall@student.unimelb.edu.au) or call +61 3 8344 9042. This research is authorised by the University of Melbourne (ethics ID1955072). Your contact details will not be used for any other purpose.
