# Supplementary material
Source: HighWire-hosted journal article supplement (https://bmjopen.bmj.com/content/11/7/e044806)
Supplement: inline-supplementary-material-2 [file inline-supplementary-material-2.pdf]

**SUPPLEMENTARY MATERIAL: COREQ 32-ITEM CHECKLIST**

Tong A, Sainsbury P, Craig J. (2007) Consolidated criteria for reporting qualitative research (COREQ): a 32- item checklist for interviews and focus groups. *International Journal for Quality in Healthcare*: 19:349 – 357

| No. Item                                       | Guide questions/description                                            | Reported on Page # |
|------------------------------------------------|------------------------------------------------------------------------|--------------------|
| <b>Domain 1: Research team and reflexivity</b> |                                                                        |                    |
| 1. Inter viewer/facilitator                    | Which author/s conducted the interview?                                | 7                  |
| 2. Credentials                                 | What were the researcher's credentials?                                | 7                  |
| 3. Occupation                                  | What was their occupation at the time of the study?                    | 7                  |
| 4. Gender                                      | Was the researcher male or female?                                     | 7                  |
| 5. Experience and training                     | What experience or training did the researcher have?                   | 7                  |
| 6. Relationship with participants established  | Was a relationship established prior to study commencement?            | 10, 21             |
| 7. Participant knowledge of interviewer        | What did the participants know about the researcher?                   | 7, 21              |
| 8. Interviewer characteristics                 | What characteristics were reported about the inter viewer/facilitator? | 7,9                |
| <b>Domain 2: study design</b>                  |                                                                        |                    |
| 9. Methodological orientation and Theory       | What methodological orientation was stated to underpin the study?      | 10                 |
| 10. Sampling                                   | How were participants selected?                                        | 6                  |
| 11. Method of approach                         | How were participants approached?                                      | 6                  |
| 12. Sample size                                | How many participants were in the study?                               | 10                 |
| 13. Non-participation                          | How many people refused to participate or dropped out? Reasons?        | 6                  |
| 14. Setting of data collection                 | Where was the data collected?                                          | 7                  |
| 15. Presence of non-participants               | Was anyone else present besides the participants and researchers?      | 7                  |
| 16. Description of sample                      | What are the important characteristics of the sample?                  | Table 2 (page 9)   |

|                                    |                                                                                                         |                  |
|------------------------------------|---------------------------------------------------------------------------------------------------------|------------------|
| 17. Interview guide                | Were questions, prompts, guides provided by the authors?                                                | Table 1 (page 7) |
| 18. Repeat interviews              | Were repeat interviews carried out?                                                                     | 7                |
| 19. Audio/visual recording         | Did the research use audio or visual recording to collect the data?                                     | 7, 10            |
| 20. Field notes                    | Were field notes made during and/or after the interview?                                                | 7                |
| 21. Duration                       | What was the duration of the interviews                                                                 | 10               |
| 22. Data saturation                | Was data saturation discussed?                                                                          | 6, 10            |
| 23. Transcripts returned           | Were transcripts returned to participants for comment and/or correction?                                | No               |
| Domain 3: analysis and findings    |                                                                                                         |                  |
| 24. Number of data coders          | How many data coders coded the data?                                                                    | 9                |
| 25. Description of the coding tree | Did authors provide a description of the coding tree?                                                   | No               |
| 26. Derivation of themes           | Were themes identified in advance or derived from the data?                                             | 10               |
| 27. Software                       | What software, if applicable, was used to manage the data?                                              | 9                |
| 28. Participant checking           | Did participants provide feedback on the findings?                                                      | No               |
| 29. Quotations presented           | Were participant quotations presented to illustrate the themes/findings? Was each quotation identified? | 10-20            |
| 30. Data and findings consistent   | Was there consistency between the data presented and the findings?                                      | 10-20            |
| 31. Clarity of major themes        | Were major themes clearly presented in the findings?                                                    | 10-20            |
| 32. Clarity of minor themes        | Is there a description of diverse cases or discussion of minor themes?                                  | 10-20            |
